1 **Protection of Hamsters Challenged with SARS-CoV-2 Variants of Concern by**  
2 **Two Doses of MVC-COV1901 Vaccine Followed by a Single Dose of Beta Variant**  
3 **Version of MVC-COV1901**

4

5 Tsun-Yung Kuo<sup>1,2</sup>, Chia-En Lien<sup>1,3</sup>, Yi-Jiun Lin<sup>1</sup>, Meei-Yun Lin<sup>1</sup>, Chung-Chin Wu<sup>1</sup>, Wei-Hsuan  
6 Tang<sup>1</sup>, Ya-Shan Chuang<sup>1</sup>, Luke Tzu-Chi<sup>1</sup> Liu, Charles Chen<sup>1,4\*</sup>

7

8 <sup>1</sup>Medigen Vaccine Biologics Corporation, Taipei City, Taiwan

9 <sup>2</sup>Department of Biotechnology and Animal Science, National Ilan University, Yilan County, Taiwan

10 <sup>3</sup> Institute of Public Health, National Yang-Ming Chiao Tung University, Taipei City, Taiwan

11 <sup>4</sup>Temple University, Philadelphia, PA 19122, USA

12 \*Corresponding author: [charles@medigenvac.com](mailto:charles@medigenvac.com)

13

14

15

16

17

18

19

20

21

22

23

24

25

26

27

28

29

30

31

## 32 **Abstract**

33       The current fight against COVID-19 is compounded by the Variants of Concern (VoCs), which can  
34 diminish the effectiveness of vaccines, increase viral transmission and severity of disease. MVC-COV1901 is  
35 a protein subunit vaccine based on the prefusion SARS-CoV-2 spike protein (S-2P) adjuvanted with CpG  
36 1018 and aluminum hydroxide. Here we used the Delta variant to challenge hamsters inoculated with S-2P  
37 based on the ancestral strain or the Beta variant in two-dose or three-dose regimens. Two doses of ancestral  
38 S-2P followed by the third dose of Beta variant S-2P was shown to induce the highest neutralizing antibody  
39 titer against live SARS-CoV-2 of the ancestral strain as well as all VoCs. All regimens of vaccination were  
40 able to protect hamsters from SARS-CoV-2 Delta variant challenge and reduce lung live virus titer. Three  
41 doses of vaccination significantly reduced lung viral RNA titer, regardless of using the ancestral or Beta  
42 variant S-2P as the third dose. Based on the immunogenicity and viral challenge data, two doses of ancestral  
43 S-2P followed by the third dose of Beta variant S-2P could induce broad and potent immune response against  
44 the variants.

## 45 **Introduction**

46 As of September 2021, the COVID-19 pandemic shows no sign of abating despite over five billion doses  
47 of vaccines administered around the world, partly due to the emergence of VoCs. The WHO so far has listed  
48 four VoCs: Alpha (B.1.1.7), Beta (B.1.351), Gamma (P.1), and Delta (B.1.617.2), and five VoIs: Eta  
49 (B.1.525), Iota (B.1.526), Kappa (B.1.617.1), Lambda (C.37), and Mu (B.1.621) [1]. The VoCs are known to  
50 reduce the *in vitro* neutralizing capability of currently available vaccines through mutations on the spike  
51 protein, especially in the receptor binding domain (RBD) [2-4]. These *in vitro* data also translate to the clinical  
52 data, with reports of considerably decreased vaccine efficacy in particular against the Beta and Delta variants  
53 [5-8]. Compared to redesigning the vaccine or creating a SARS-CoV-2 universal vaccine, the use of a booster  
54 dose may be currently the best way to protect against the variants [9-11] However, the use of boosters has led  
55 to heated political debates at a time where vaccine parity is laid bare between vaccine stockpiling in developed  
56 nations and critical lack of vaccine in developing nations [12-14].

57 MVC-COV1901 is a protein subunit vaccine based on the S-2P protein adjuvanted with CpG 1018 and  
58 aluminum hydroxide and has been shown to be safe and highly immunogenic in preclinical studies and clinical  
59 trials [15-18]. The vaccine has been approved for emergency use in Taiwan and is given intramuscularly as  
60 two doses separated by four weeks [19]. We have previously shown that two doses of MVC-COV1901 could  
61 induce neutralizing antibodies against SARS-CoV-2 variants with increasing tendency of higher  
62 immunogenicity at higher dose level [20]. In the same study we found that a third dose of S-2P in rats was  
63 able to increase neutralizing titer against the Beta variant compared to two doses of S-2P [20]. For the current  
64 study we expand on our previous findings to investigate the immunogenicity of third dose booster against the  
65 VoCs.

66

## 67 **Results**

68 **Induction of neutralizing antibodies against VoCs in hamsters immunized with two doses of S-2P**  
69 **derived from original MVC-COV1901, Beta variant, or a bivalent combination of both.**

70 We have previously shown that there was an approximately 7-fold reduction of neutralizing antibody  
71 titer against the Beta variant in vaccinees' sera from the MVC-COV1901 phase I trial [20]. As a strategy to  
72 combat against the Beta variant, we have developed the Beta variant version of S-2P adjuvanted with 750  $\mu\text{g}$   
73 of CpG 1018 and 375  $\mu\text{g}$  of aluminum hydroxide. We have previously established that two doses of one-fifth  
74 amount of low or high human doses of MVC-COV1901 were sufficient in protecting hamsters from  
75 SARS-CoV-2 infection [15]. Since the Delta variant instead of the Beta variant has become prevalent  
76 world-wide, we investigated the protective effects of MVC-COV1901, its Beta variant version of S-2P, or the  
77 ancestral/Beta S-2P bivalent vaccine on hamsters challenged with the Delta variant. The experimental design  
78 is outlined in Figure 1, where five groups of hamsters received different regimens of S-2P derived from the  
79 ancestral and/or Beta variant, while a sixth group was administered with adjuvant alone. We first examined  
80 the neutralizing antibody titers from hamsters immunized with two doses of one-fifth amount of low dose  
81 MVC-COV1901 (i.e. 1  $\mu\text{g}$  S-2P adjuvanted with 150  $\mu\text{g}$  CpG 1018 and 75  $\mu\text{g}$  aluminum hydroxide), Group A  
82 (W + W), against all VoCs. As shown in Figure 2, at five weeks after the second injection of Group A  
83 hamsters, reciprocal neutralizing antibody titer 50 ( $\text{NT}_{50}$ ) GMT of 2201, 581, 166, 193, and 742 against the  
84 ancestral strain, Alpha, Beta, Gamma, and Delta variants were obtained, respectively. Compared to the  
85 neutralizing titer against the ancestral strain, that against the Alpha, Beta, Gamma, and Delta variants showed  
86 3.79-, 13.30-, 11.39-, and 2.97-fold reduction, respectively. This demonstrated that two doses of S-2P derived  
87 from ancestral strain was relatively effective against the Alpha and Delta variants. However, the effectiveness  
88 was significantly reduced against the Beta and Gamma variants.

89 We next examined the neutralizing antibody titers from hamsters immunized with two doses of 1  $\mu\text{g}$  of  
90 the Beta variant version of S-2P combined with 150  $\mu\text{g}$  CpG 1018 and 75  $\mu\text{g}$  aluminum hydroxide, Group B  
91 (B + B). Figure 2 shows that two doses of the adjuvanted Beta variant S-2P induced lower GMT against the  
92 ancestral strain but increased against the Beta variant compared to group A, which were 681 and 417,  
93 respectively. However, compared to group A, the neutralizing titers of this regimen were lower against the  
94 Alpha and Delta variants, which were 181 and 182, respectively.

95 We also explored the neutralizing antibody responses of bivalent vaccine in Group C hamsters [(W + B)  
96 + (W + B)]. The bivalent vaccine induced a similar degree of neutralizing antibody titers against the ancestral  
97 strain, Alpha, and Delta variants to that of the W+W group. This combination fared better against the Beta and  
98 Gamma variants than that of the W+W group. However, several individual hamsters did not show any  
99 neutralization titer against these variants.

100

101 **Induction of neutralizing antibodies against VoCs in hamsters immunized with two doses of**  
102 **MVC-COV19 combined with a third dose of MVC-COV1901 or its Beta variant version of S-2P.**

103 We previously found that neutralizing antibody titers against the Beta variant were increased  
104 substantially in rats receiving three doses rather than two doses of MVC-COV1901 [20]. Therefore, we  
105 immunized hamsters with a third dose of one-fifth amount of MVC-COV1901, Group D (W + W + W), to  
106 examine antibody responses against VoCs. As shown in Figure 2, at five weeks after the third injection of  
107 Group D hamsters, NT<sub>50</sub> GMTs were 4302, 1217, 281, 377, and 1368 against the ancestral strain, Alpha, Beta,  
108 Gamma, and Delta variants, respectively. The neutralizing titer against the Alpha, Beta, Gamma, and Delta  
109 variants had 3.54-, 15.31-, 11.41- and 3.14-fold decrease, respectively, compared to that of the ancestral strain.  
110 Compared to Group A hamsters, which received only 2 doses, the neutralizing antibody titers in Group D  
111 hamsters against VoCs increased proportionally with the additional third dose. Consequently, the third dose  
112 not only increased the neutralizing antibody titers against the Delta variant but also compensate the reduction  
113 in neutralizing antibody titers against the Beta and Gamma variants found in the W+W group.

114 We also explored the possibility of using the Beta variant version of S-2P adjuvanted with CpG 1018  
115 and aluminum hydroxide as the third dose in Group E (W + W + B). As shown in Figure 2, at five weeks after  
116 the third injection of Group E hamsters, NT<sub>50</sub> GMTs were 6643, 1889, 1034, 1306, and 3595 against the  
117 ancestral strain, Alpha, Beta, Gamma, and Delta variants, respectively. Compared to the neutralizing titer  
118 against the ancestral strain, that against the Alpha, Beta, Gamma, and Delta variants had 3.52-, 6.42-, 5.09-  
119 and 1.85-fold reduction, respectively. Two doses of ancestral S-2P combined with CpG and aluminum  
120 hydroxide followed by third dose of the adjuvanted Beta variant S-2P induced the best neutralization effect

121 against the ancestral strain and all VoCs when compared to the other groups, especially against the Delta  
122 variant. The dosing regimens in Groups A to E resulted in 1.9- to 3.8-fold reduction of NT<sub>50</sub> GMT against the  
123 Delta variant than that of the ancestral strain. However, the NT<sub>50</sub> titers against the ancestral strain were  
124 different in each of the group. By far, the Beta variant S-2P would be most suitable for the third booster shot  
125 before we develop the vaccine based on the Delta variant S-2P. Thus, we are able to induce a broad spectrum  
126 of neutralizing antibodies against all VoCs by two doses of MVC-COV19 followed by the third dose of its  
127 Beta version of S-2P.

128 **Protection from the Delta variant challenge in hamsters immunized with two doses of MVC-COV1901**  
129 **or combined with a third dose of MVC-COV1901 or its Beta variant version of S-2P.**

130 At eight weeks after completion of the last immunization, hamsters were challenged with 10<sup>4</sup> PFU of the  
131 Delta variant and body weights were tracked up to six days post infection (d.p.i.). All the vaccinated groups  
132 did not show weight loss up to six days after virus challenge, compared with the adjuvant control. The  
133 protective effect was most significant at 6 d.p.i. in vaccinated groups, while the adjuvant only group  
134 experienced significant weight loss (Figure 3).

135 Lung viral load was measured by viral RNA and 50% tissue culture infectious dose (TCID<sub>50</sub>) assays.  
136 Figure 4A shows that lung viral RNA in Groups A to E hamsters were lower than that of the adjuvant control,  
137 and only that in Group E decreased significantly compared to adjuvant control. In contrast, the viral titers in  
138 all of the vaccinated hamsters measured by TCID<sub>50</sub> were significantly lower than that of the adjuvant control  
139 at 3 d.p.i. (Figure 4B). Note that viral load, especially viral titer measured by TCID<sub>50</sub> dropped noticeably at 6  
140 d.p.i. in adjuvant control group due to hamsters' natural immune response (Figure 4 B). Intriguingly, we have  
141 found a moderately negative correlation (Spearman  $r_s = -0.8227$ ) between NT<sub>50</sub> titer against the Delta variant  
142 from serum sampled five weeks after the final immunization and the number of viral genome at 3 d.p.i.  
143 (Figure 5). The level of NT<sub>50</sub> titer after immunization could be predictive of the clearance of virus in the lungs  
144 post viral challenge.

145

## 146 **Discussion**

147        This study is our second hamster SARS-CoV-2 challenge study, whereas in the first study we have  
148 shown both low and high dose of S-2P were effective against live SARS-CoV-2 virus challenge in hamster; in  
149 this study we have extended our concept to variant-based booster dose and challenge with the Delta variant  
150 [16]. As the Delta variant has emerged to become the more infectious and the dominant strain in majority of  
151 the world, it has been chosen as our model virus for infection [21]. In the immunogenicity data, as expected,  
152 immunization with either two doses of ancestral S-2P or two doses of Beta variant S-2P could not confer  
153 broad protection against all strains tested. Ancestral S-2P was ineffective against the Beta and Gamma  
154 variants, whereas Beta variant S-2P induced higher neutralizing titers against only the Beta variant (Figure 2).  
155 Bivalent mixture of both ancestral and Beta variant S-2Ps had similar results with two doses of ancestral S-2P  
156 but with slightly increased immunogenicity against the Beta and Gamma variants. Three doses of ancestral  
157 S-2P was able to boost the titers against the Beta and Gamma to that of the bivalent vaccine and further  
158 increased the titers against the Alpha and Delta variants. This study reveals that using the Beta variant S-2P as  
159 the third dose induces the broad spectrum of increased NT<sub>50</sub> against all variants as well as the ancestral strain.  
160 It is of interest to note the ratio between the NT<sub>50</sub> of the ancestral strain and Alpha variant, and the ancestral  
161 strain and Delta variant remain relatively stable ranging from 3.52 to 3.79 for the former and 1.85 to 3.75 for  
162 the latter regardless of the regimen used when compared with the Beta or Gamma variants, which fluctuated  
163 variably (Figure 2).

164        All five regimens of vaccination protected hamsters from weight loss induced by the Delta variant  
165 infection (Figure 3). Notably, while group B produced poor antibody response against the Delta variant, this  
166 group of hamster did not experience any weight loss. Furthermore, the viral titers of Delta variant in Group B  
167 was significantly lower than that of the adjuvant control (Figure 4B), suggesting that the amount of anti-Delta  
168 antibodies and/or T cell immune responses induced by two doses of the Beta variant S-2P could reduce viral  
169 replication in the lungs and protect the hamsters from weight loss. T cell immunity also plays major role in  
170 concert with humoral immunity in vaccine- or infection-induced immunity against SARS-CoV-2 and  
171 clearance of virus [22-25]. Previous studies shows that memory T cell pool has been selected by prior

172 infection (or vaccination) can be activated upon encountering heterologous virus if cross-reactive epitopes are  
173 shared between the two viruses [26]. The broad neutralizing ability of immunizing with ancestral strain and  
174 Beta variant S-2Ps in succession could presumably have been induced by cross-reactivity of memory B cells  
175 and T cells. This is similar to the concept of the original antigenic sin, in which previous exposure to a virus  
176 can cause antibody response to preferably secrete antibodies against the first virus after exposure to a similar  
177 virus strain due to shared epitopes [26]. Cross-reactivity of T cells have also been noted for rapid induction of  
178 immunity following infection or immunization with SARS-CoV-2 [22]. Since neutralizing antibodies induced  
179 by vaccines are polyclonal, they could also cross-react with shared epitopes between different variants.  
180 Polyclonal antibodies induced by SARS-CoV-2 spike mRNA vaccine were profiled to consist of a mixture of  
181 antibodies targeting the N-terminal domain (NTD) and the RBD and differ in their binding and neutralizing  
182 abilities [27, 28]. After three doses of vaccination, the re-induction of immunity after virus challenge may  
183 explain for the low viral RNA titer in hamster immunized with either of the three-dose regimens (Figure 4).  
184 One interesting observation is the negative correlation between NT<sub>50</sub> titer and viral RNA of the Delta variant  
185 (Figure 5). However, the TCID<sub>50</sub> in all groups were very low and almost undetectable in most of the cases  
186 (Figure 4). This may due to the sensitivity of the TCID<sub>50</sub> assay itself or the viral RNA assay may be detecting  
187 fragments of viral RNA from dead viruses as opposed to live replicating viruses. In future studies,  
188 subgenomic RNA detection should also be used to detect replicating viruses to corroborate with the TCID<sub>50</sub>  
189 results. The establishment of correlates of protection using the relationship between NT50 titer and viral RNA  
190 in a given hamster challenge model will facilitate expedited evaluation of vaccine combination in future  
191 development process.

192 One limitation of this study is that we have not tested the vaccine's protection in vivo with other VoCs,  
193 so the vaccine efficacy against other VoCs is inferred from the neutralizing antibody titers. The natural course  
194 of infection among the hamsters includes convalescent state, so the model does not allow for evaluating  
195 mortality or severe disease as endpoints. T-cell functions were not evaluated, limiting the assessment of role  
196 of cellular immunity in the role of protection. Two recent studies investigated the effects of booster dose of  
197 ChAdOx1 and mRNA-1273 [9, 29]. Administration of a third dose using Beta variant version of mRNA-1273



198 (mRNA-1273.351) after two doses of mRNA-1273 had lower adverse events and increased immunogenicity  
199 against the Beta variant than three doses of mRNA-1273; while administration of either mRNA-1273 or  
200 mRNA1273-351 as third dose exponentially boosted immunogenicity against all variants tested compared to  
201 two doses of mRNA1273 [9]. While in ChAdOx1, the third dose induced generally less adverse events than  
202 that of first or second dose, and third dose boosted neutralization titers against the Beta and Delta variants as  
203 well as gamma-interferon levels [29]. These findings appear to corroborate our results that a third dose of  
204 vaccination could boost immune response against the virus and its variants.

205 As an extension of phase 1 clinical trial of MVC-COV1901, the participants were administered with a  
206 booster vaccination of the original S-2P at 180 days after the second immunization to investigate the clinical  
207 effect of the booster shot (NCT04487210). At the time of administering the booster dose in the phase 1  
208 extension trial, only the original S-2P based on the ancestral strain was available; however, based on the result  
209 of group D in this study, we expect to see boosting immunogenicity against the variants compared to the  
210 current two-dose regimen. An ideal effect of an antigen construct of a booster vaccine after the primary series  
211 should be able to increase protection against the prevailing VoC, such as the Delta strain, and at the same time,  
212 render adequate protection against vaccine escape strains, such as the Beta stain. The third shot (second  
213 booster) using a Beta strain vaccine construct in our hamster model demonstrated wider breath of  
214 cross-reactivity against VoCs and similar protection against the Delta strain compared with the third shot  
215 using the ancestral strain vaccine. The booster and challenge study results in hamsters and the phase 1  
216 extension studies booster results in humans provide us with potential strategies against the VoCs in the future  
217 by administering a Beta variant S-2P as the booster shot. These results support our further development plan  
218 to test the Beta variant S-2P vaccine as a booster after the primary series of MVC-COV1901 vaccine in  
219 clinical settings.

220

## 221 **Methods**

### 222 **Animals and ethical statements**

223 Female golden Syrian hamsters aged 8-10 weeks at study initiation were obtained from the National  
 224 Laboratory Animal Center (Taipei, Taiwan). Animal immunizations were conducted in the Testing Facility for  
 225 Biological Safety, TFBS Bioscience Inc., Taiwan. At 3 weeks after the final immunization, the animals were  
 226 transferred to Academia Sinica, Taiwan, for SARS-CoV-2 challenge. All procedures in this study involving  
 227 animals were conducted in a manner to avoid or minimize discomfort, distress, or pain to the animals and  
 228 were carried out in compliance with the ARRIVE guidelines (<https://arriveguidelines.org/>). All animal work in  
 229 the current study was reviewed and approved by the Institutional Animal Care and Use Committee (IACUC)  
 230 with animal study protocol approval number TFBS2020-019 and Academia Sinica (approval number:  
 231 20-06-1483).

232

### 233 **Immunization and challenge of hamsters**

234 The study design is outlined in Figure 1. The hamsters were split into the following six groups with n =  
 235 10 for each group (Table 1):

236

| Groups                      | Source of S-2P protein                                        |                                                               |                                                     |
|-----------------------------|---------------------------------------------------------------|---------------------------------------------------------------|-----------------------------------------------------|
|                             | First immunization                                            | Second immunization                                           | Third immunization                                  |
| <b>A: W + W</b>             | Ancestral strain (1 µg)                                       | Ancestral strain (1 µg)                                       | -                                                   |
| <b>B: B + B</b>             | Beta variant (1 µg)                                           | Beta variant (1 µg)                                           | -                                                   |
| <b>C: (W + B) + (W + B)</b> | Ancestral strain (0.5µg) and<br>Beta variant (0.5µg) bivalent | Ancestral strain (0.5µg) and<br>Beta variant (0.5µg) bivalent | -                                                   |
| <b>D: W + W + W</b>         | Ancestral strain (1 µg)                                       | Ancestral strain (1 µg)                                       | Ancestral strain (1 µg)                             |
| <b>E: W + W + B</b>         | Ancestral strain (1 µg)                                       | Ancestral strain (1 µg)                                       | Beta variant (1 µg)                                 |
| <b>F: Adjuvant control</b>  | CpG 1018 (150 µg) and<br>aluminum hydroxide (75 µg)           | CpG 1018 (150 µg) and<br>aluminum hydroxide (75 µg)           | CpG 1018 (150 µg) and<br>aluminum hydroxide (75 µg) |

237

238 Hamsters in group A were vaccinated on days 22 and 43 with 1  $\mu$ g of S-2P protein derived from the  
239 ancestral strain. Hamsters in group B were vaccinated on days 22 and 43 with 1  $\mu$ g of S-2P protein derived  
240 from Beta variant. Hamsters in group C were vaccinated on days 22 and 43 with a mixture of the ancestral  
241 strain (0.5  $\mu$ g) and Beta variant (0.5  $\mu$ g) of S-2P protein (bivalent vaccine). Hamsters in group D were  
242 vaccinated on days 1, 22, and 43 with 1  $\mu$ g of S-2P protein derived from the ancestral strain. Hamsters in  
243 group E were vaccinated on days 1 and 22 with 1  $\mu$ g of S-2P protein derived from the ancestral strain, and on  
244 day 43 with 1  $\mu$ g of S-2P protein derived from the Beta variant. Hamsters in group F served as an adjuvant  
245 control and were vaccinated with only 150  $\mu$ g of CpG 1018 and 75  $\mu$ g of aluminum hydroxide (alum) on days  
246 1, 22 and 43. All immunization with S-2P were adjuvanted with 150  $\mu$ g of CpG 1018 and 75  $\mu$ g of alum.  
247 Serum samples were collected five weeks after the final immunization and immunogenicity was determined  
248 by neutralization assay with SARS-CoV-2 virus and the variants. Approximately three weeks after the serum  
249 sampling (53 days after the final immunization), hamsters were challenged with the SARS-CoV-2 Delta  
250 variant (hCoV-19/Taiwan/1144) and then sacrificed at 3 d.p.i. (n = 5 per group) or 6 d.p.i. (n = 5 per group)  
251 for analyses of lung viral loads, lung TCID<sub>50</sub>. Body weight of individual hamsters were tracked daily up to the  
252 time of sacrifice.

253

#### 254 **Live SARS-CoV-2 neutralization assay**

255 SARS-CoV-2 virus and variants used in the assay consisted of the follow obtained from the Taiwan  
256 CDC: Ancestral (Wuhan) strain (hCoV-19/Taiwan/4/2020, GISAID EPI\_ISL\_41192), Alpha  
257 (hCoV-19/Taiwan/792, GISAID EPI\_ISL\_1381386), Beta (hCoV-19/Taiwan/1013), Gamma  
258 (hCoV-19/Taiwan/906), and Delta (hCoV-19/Taiwan/1144). Live virus neutralization assay were performed  
259 as described previously [18].

260

#### 261 **Viral RNA quantification and cell culture infectious assay (TCID<sub>50</sub>)**

262 Quantification of lung viral load by real-time PCR and TCID<sub>50</sub> assay were performed as previously  
263 reported [16].

264

## 265 **Statistical analysis**

266 The analysis package in Prism 6.01 (GraphPad) was used for statistical analysis. Spearman's rank  
267 correlation coefficient was and linear regression were calculated for Figure 5. Kruskal-Wallis with corrected  
268 Dunn's multiple comparisons test and two-way ANOVA with Dunnett test for multiple comparison were used  
269 to calculate significance in Figures 2 to 4 where appropriate. \* =  $p < 0.05$ , \*\* =  $p < 0.01$ , \*\*\* =  $p < 0.001$ ,  
270 \*\*\*\* =  $p < 0.0001$

271

## 272 **Acknowledgements**

273 We would like to thank the team members at TFBS Bioscience Incorporation for hamster housing and  
274 immunization process, and the Biosafety Level 3 Facility of Academia Sinica, Taiwan, for providing  
275 environment to handling and performing SARS-CoV-2 hamster challenge and live SARS-CoV-2  
276 neutralization assay. We also thank John D Campbell and Paula Traquina of Dynavax Technologies for  
277 reviewing and providing helpful inputs toward the manuscript.

278

## 279 **Author Contributions**

280 T.-Y. K., C.-C. W., and W.-H. T. produced the ancestral and Beta variant versions of S-2P antigens used  
281 in the study. T.-Y. K., C.-E. L., Y.-J. L., M.-Y. L., C.-C. W, W.-H. T., Y.-S. C., and C. C. designed the study  
282 and experiments. Y.-J. L. and Y.-S. C. supervised the experiments at TFBS Bioscience and Academia Sinica.  
283 Y.-J. L., M.-Y.-L., Y.-S. C., and L. T.-C. L. analyzed the results. M.-Y. L., Y.-S. C., and L. T.-C. L. drafted  
284 the manuscript. All authors reviewed and approved of the final version of the manuscript.

285

## 286 **Competing Interests**

287 C. C., T.-Y. K., C.-C. W., W.-H. T, C.-E. L., Y.-J. L., and M.-Y. L. are co-inventors for US provisional  
288 patent applications 63/240,408, 63/240,080, and 63/248,189.

289

290

## 291 **References**

- 292 1. World Health Organization. Tracking SARS-CoV-2 variants. Available at:  
293 <https://www.who.int/en/activities/tracking-SARS-CoV-2-variants/>. Accessed 15 September, 2021.
- 294 2. Choi A, Koch M, Wu K, *et al.* Serum neutralizing activity of mRNA-1273 against SARS-CoV-2  
295 variants. *bioRxiv*. 2021 Jan 1.
- 296 3. Jongeneelen M, Kaszas K, Veldman D, *et al.* Ad26. COV2. S elicited neutralizing activity against Delta  
297 and other SARS-CoV-2 variants of concern. *bioRxiv*. 2021 Jan 1.
- 298 4. Liu C, Ginn HM, Dejnirattisai W, *et al.* Reduced neutralization of SARS-CoV-2 B. 1.617 by vaccine and  
299 convalescent serum. *Cell*. 2021 Aug 5;184(16):4220-36.
- 300 5. Emary KR, Golubchik T, Aley PK, *et al.* Efficacy of ChAdOx1 nCoV-19 (AZD1222) vaccine against  
301 SARS-CoV-2 variant of concern 202012/01 (B. 1.1. 7): an exploratory analysis of a randomised  
302 controlled trial. *The Lancet*. 2021 Apr 10;397(10282):1351-62.
- 303 6. Madhi SA, Baillie V, Cutland CL, *et al.* Efficacy of the ChAdOx1 nCoV-19 Covid-19 vaccine against  
304 the B. 1.351 variant. *New England Journal of Medicine*. 2021 May 20;384(20):1885-98.
- 305 7. Puranik A, Lenehan PJ, Silvert E, *et al.* Comparison of two highly-effective mRNA vaccines for  
306 COVID-19 during periods of Alpha and Delta variant prevalence. *medRxiv*. 2021 Aug 8.
- 307 8. Lopez Bernal J, Andrews N, Gower C, *et al.* Effectiveness of Covid-19 vaccines against the B. 1.617. 2  
308 (delta) variant. *New England Journal of Medicine*. 2021 Jul 21.
- 309 9. Wu K, Choi A, Koch M, *et al.* Preliminary analysis of safety and immunogenicity of a SARS-CoV-2

- 310 variant vaccine booster. medRxiv. 2021 Jan 1.
- 311 10. Sagonowsky E. “Moderna, citing variants and waning immunity, expects COVID-19 boosters to become  
312 a fact of life”. Aug 5, 2021. Available at:  
313 [https://www.fiercepharma.com/pharma/moderna-citing-variants-and-waning-immunity-expects-covid-19](https://www.fiercepharma.com/pharma/moderna-citing-variants-and-waning-immunity-expects-covid-19-boosters-to-become-a-fact-life)  
314 [-boosters-to-become-a-fact-life](https://www.fiercepharma.com/pharma/moderna-citing-variants-and-waning-immunity-expects-covid-19-boosters-to-become-a-fact-life). Accessed 17 September, 2021.
- 315 11. Pfizer and BioNTech. “Pfizer and BioNTech Provide Update on Booster Program in Light of the  
316 Delta-Variant”. July 8, 2021. Available at:  
317 [https://cdn.pfizer.com/pfizercom/2021-07/Delta\\_Variant\\_Study\\_Press\\_Statement\\_Final\\_7.8.21.pdf?IPp](https://cdn.pfizer.com/pfizercom/2021-07/Delta_Variant_Study_Press_Statement_Final_7.8.21.pdf?IPpR1xZjlwvaUMQ9sRn2FkePcBiRPGqw)  
318 [R1xZjlwvaUMQ9sRn2FkePcBiRPGqw](https://cdn.pfizer.com/pfizercom/2021-07/Delta_Variant_Study_Press_Statement_Final_7.8.21.pdf?IPpR1xZjlwvaUMQ9sRn2FkePcBiRPGqw). Accessed 17 September, 2021.
- 319 12. Kar-gupta S and Copley C. “Ignoring WHO call, major nations stick to vaccine booster plans”. August 6,  
320 2021. Available at:  
321 [https://www.reuters.com/world/europe/french-president-macron-third-covid-vaccine-doses-likely-elderly](https://www.reuters.com/world/europe/french-president-macron-third-covid-vaccine-doses-likely-elderly-vulnerable-2021-08-05/)  
322 [-vulnerable-2021-08-05/](https://www.reuters.com/world/europe/french-president-macron-third-covid-vaccine-doses-likely-elderly-vulnerable-2021-08-05/). Accessed 17 September, 2021.
- 323 13. Dunleavy K. “Biden administration's push for COVID boosters raises concerns about the science and  
324 morality of the plan”. August 19, 2021. Available at:  
325 [https://www.fiercepharma.com/pharma/u-s-rush-to-endorse-covid-boosters-raises-concerns-about-proces](https://www.fiercepharma.com/pharma/u-s-rush-to-endorse-covid-boosters-raises-concerns-about-process-and-morality)  
326 [s-and-morality](https://www.fiercepharma.com/pharma/u-s-rush-to-endorse-covid-boosters-raises-concerns-about-process-and-morality). Accessed 17 September, 2021.
- 327 14. Henley J. “Covid booster jabs ‘not a luxury’ and protect the vulnerable, says WHO”. August 30, 2021.  
328 Available at:

- 329 <https://www.theguardian.com/world/2021/aug/30/covid-booster-jabs-not-a-luxury-and-protect-the-vulnerable-says-who>. Accessed 17 September, 2021.
- 330
- 331 15. Kuo TY, Lin MY, Coffman RL, *et al.* Development of CpG-adjuvanted stable prefusion SARS-CoV-2
- 332 spike antigen as a subunit vaccine against COVID-19. *Scientific reports*. 2020 Nov 18;10(1):1-0.
- 333 16. Lien CE, Lin YJ, Chen C, *et al.* CpG-adjuvanted stable prefusion SARS-CoV-2 spike protein protected
- 334 hamsters from SARS-CoV-2 challenge. *Scientific reports*. 2021 Apr 22;11(1):1-7.
- 335 17. Hsieh SM, Liu WD, Huang YS *et al.* Safety and Immunogenicity of a Recombinant Stabilized Prefusion
- 336 SARS-CoV-2 Spike Protein Vaccine (MVC-COV1901) Adjuvanted With CpG 1018 and Aluminum
- 337 Hydroxide in Healthy Adults: A Phase 1, Dose-Escalation Study. *EClinicalMedicine*. June 26, 2021.
- 338 18. Szu-Min H, Liu MC, Chen YH, *et al.* Safety and Immunogenicity of CpG 1018 and Aluminium
- 339 Hydroxide-Adjuvanted SARS-CoV-2 S-2P Protein Vaccine MVC-COV1901: A Large-Scale
- 340 Double-Blind, Randomised, Placebo-Controlled Phase 2 Trial. *medRxiv*. 2021 Jan 1.
- 341 19. Blanchard B and Lee Y. “Taiwan approves Medigen's COVID-19 vaccine candidate”. July 19, 2021.
- 342 Available at:
- 343 <https://www.reuters.com/world/asia-pacific/taiwan-approves-production-medigens-covid-19-vaccine-candidate-2021-07-19/>”. Accessed September 17, 2021.
- 344
- 345 20. Lien CE, Kuo TY, Lin YJ, *et al.* Evaluating the neutralizing ability of a CpG-adjuvanted S-2P subunit
- 346 vaccine against SARS-CoV-2 Variants of Concern. *Clin Infect Dis*. 2021. In press.
- 347 21. Julia LM, Ginger T, Alaa AL, *et al.* Delta Variant Report, outbreak.info. Available online:

- 348 <https://outbreak.info/situation-reports/delta>. Accessed September 17, 2021.
- 349 22. Loyal L, Braun J, Henze L, *et al.* Cross-reactive CD4+ T cells enhance SARS-CoV-2 immune responses  
350 upon infection and vaccination. medRxiv. 2021 Jan 1.
- 351 23. Oberhardt V, Luxemburger H, Kemming J, *et al.* Rapid and stable mobilization of CD8+ T cells by  
352 SARS-CoV-2 mRNA vaccine. Nature. 2021 Jul 28:1-6.
- 353 24. Ewer KJ, Barrett JR, Belij-Rammerstorfer S, *et al.* T cell and antibody responses induced by a single  
354 dose of ChAdOx1 nCoV-19 (AZD1222) vaccine in a phase 1/2 clinical trial. Nature medicine. 2021  
355 Feb;27(2):270-8.
- 356 25. Neidleman J, Luo X, Mgregor M, *et al.* mRNA vaccine-induced SARS-CoV-2-specific T cells recognize  
357 B. 1.1. 7 and B. 1.351 variants but differ in longevity and homing properties depending on prior  
358 infection status. bioRxiv. 2021 Jan 1.
- 359 26. Welsh RM and Selin LK. No one is naive: the significance of heterologous T-cell immunity. Nature  
360 Reviews Immunology. 2002 Jun;2(6):417-26.
- 361 27. Amanat F, Thapa M, Lei T, *et al.* The plasmablast response to SARS-CoV-2 mRNA vaccination is  
362 dominated by non-neutralizing antibodies that target both the NTD and the RBD. medRxiv. 2021 March  
363 9.
- 364 28. Tong P, Gautam A, Windsor I, *et al.* Memory B cell repertoire for recognition of evolving SARS-CoV-2  
365 spike. bioRxiv. 2021 March 10.
- 366 29. Flaxman A, Marchevsky NG, Jenkin D, *et al.* Reactogenicity and immunogenicity after a late second



367 dose or a third dose of ChAdOx1 nCoV-19 in the UK: a substudy of two randomised controlled trials

368 (COV001 and COV002). The Lancet. 2021 Sep 1.

369

370

371

372

373

374

375

376

377

378

## 379 Figures

380

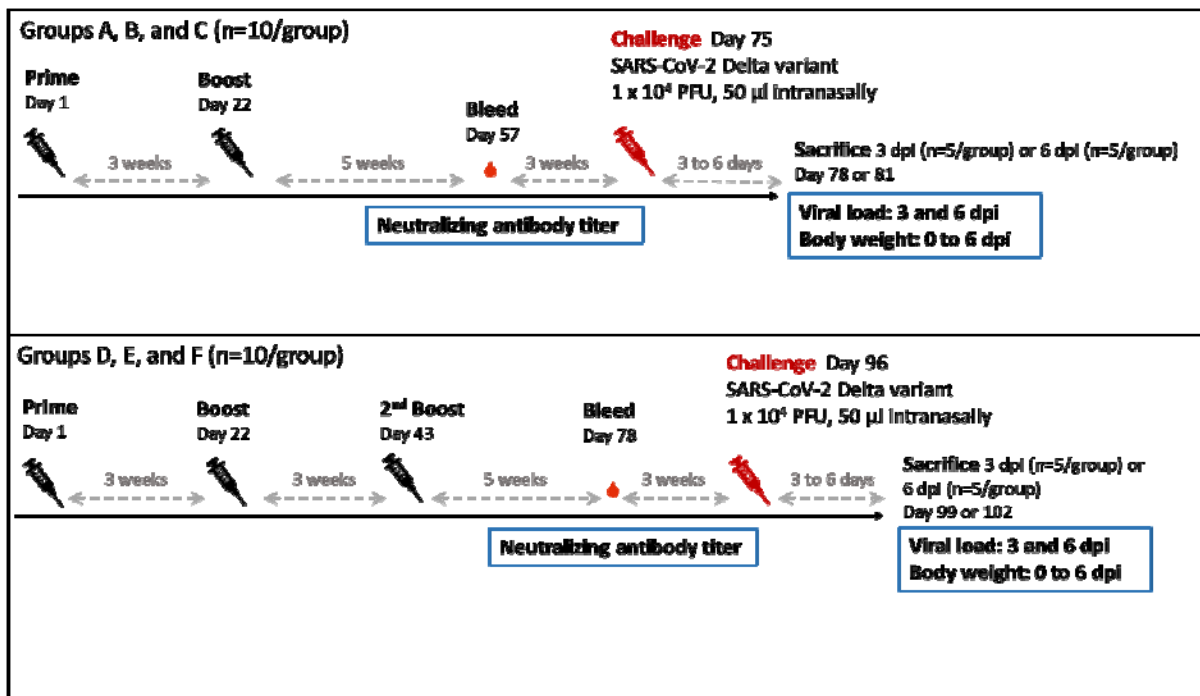

381

382 Figure 1. Study design of the hamster challenge study.

383 Hamsters (N=10 per group) were immunized twice (groups A, B, and C) or three times (groups D, E, and  
 384 F) at three weeks apart and serum samples were taken for immunogenicity assays five weeks after the final  
 385 immunization. Eight weeks after the final immunization, hamsters were challenged with  $10^4$  PFU of  
 386 SARS-CoV-2 Delta variant. The animals were euthanized on the third or sixth day after infection for necropsy  
 387 and tissue sampling to determine viral load. Body weight of individual hamster were tracked daily up to the  
 388 time of sacrifice.

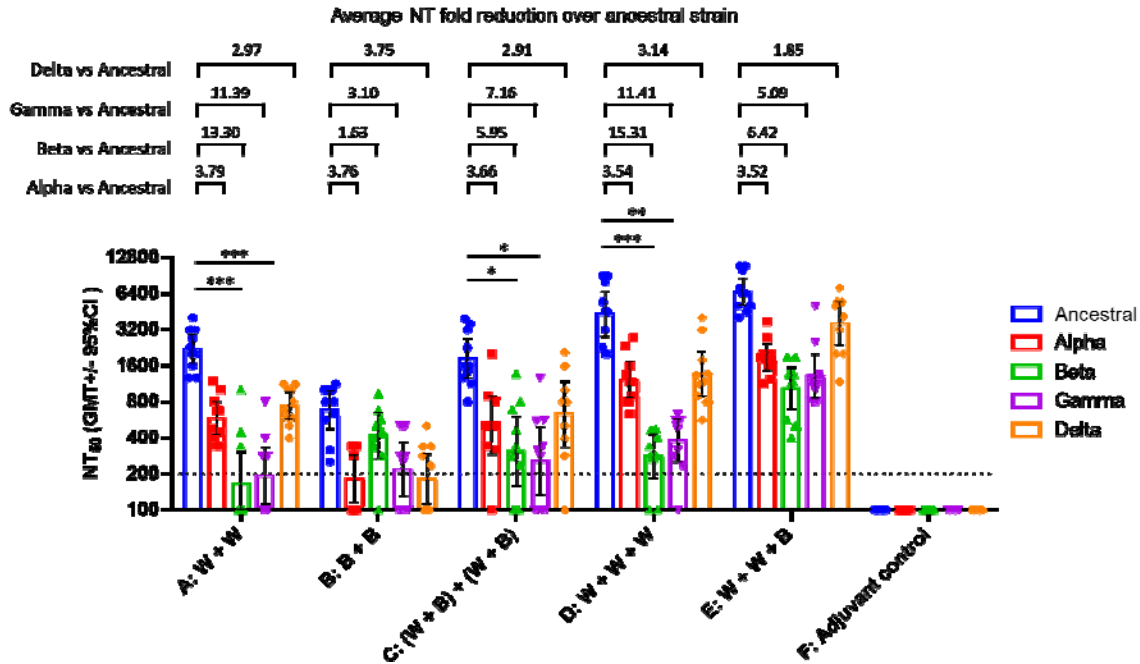

389

390 **Figure 2. Neutralizing antibody titers with live SARS-CoV-2 neutralization assay in hamsters five**  
 391 **weeks after the final immunization.** Hamsters were immunized as in Figure 1. Five weeks after the final  
 392 immunization (second immunization for groups A, B, and C; third immunization for groups D, E, and F),  
 393 serum samples were taken for neutralization assays against live SARS-CoV-2 ancestral strain and Alpha, Beta,  
 394 Gamma, and Delta variants. Results are shown as bars indicating the NT<sub>50</sub> GMT with individual values  
 395 displayed as symbols and error bars showing the 95% confidence intervals. Average fold reduction in GMT of  
 396 variants against the ancestral strain were calculated and shown above brackets above the corresponding bars.  
 397 W: ancestral (Wuhan) strain S-2P; B: Beta variant S-2P; W + B: bivalent mixture of ancestral and Beta variant  
 398 S-2Ps. Statistical significance was calculated with Kruskal-Wallis test with corrected Dunn's multiple  
 399 comparisons test.

400

401

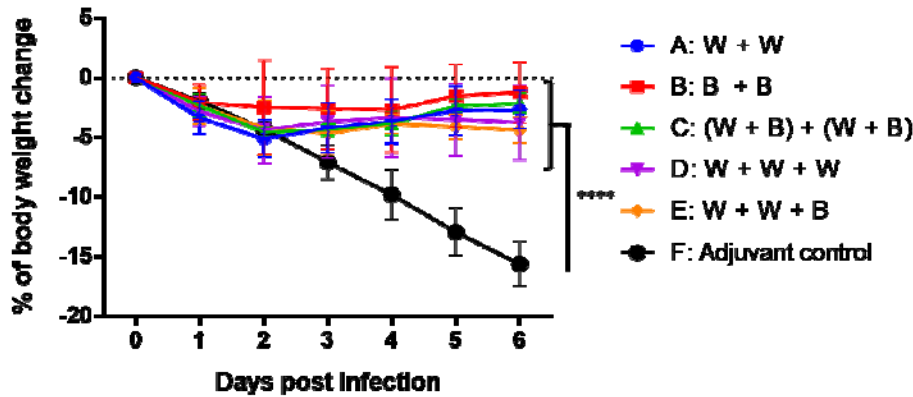

402

403 **Figure 3. Change in body weight in hamsters after infection with SARS-CoV-2 Delta variant.**

404 Hamsters were challenged with SARS-CoV-2 Delta variant eight weeks after the final immunization. The  
 405 body weights of individual hamsters were tracked daily up to the time of euthanizing at six days post infection.  
 406 (n = 5/group). Results are shown as percent of weight relative to the day of challenge (day 0). Statistical  
 407 significance was calculated with two-way ANOVA with Dunnett multiple comparison test with adjuvant only  
 408 as control.

409

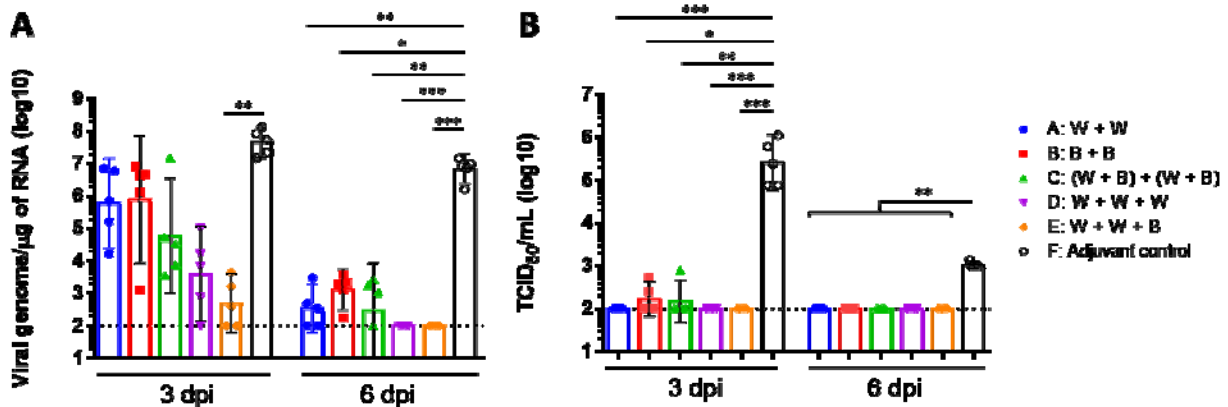

410

411 **Figure 4. Viral load in hamsters three or six days post infection with SARS-CoV-2 Delta variant.**

412 The hamsters were euthanized at three or six days (n = 5/group) after infection and lung tissue samples  
 413 were collected for viral load determination by **A.** quantitative PCR of viral genome RNA, and **B.** TCID<sub>50</sub>  
 414 assay for virus titer. Results are presented as geometric means with individual values represented by symbols  
 415 and error bars representing 95% confidence interval. Statistical significance was calculated with  
 416 Kruskal-Wallis test with corrected Dunn's multiple comparisons test.

417

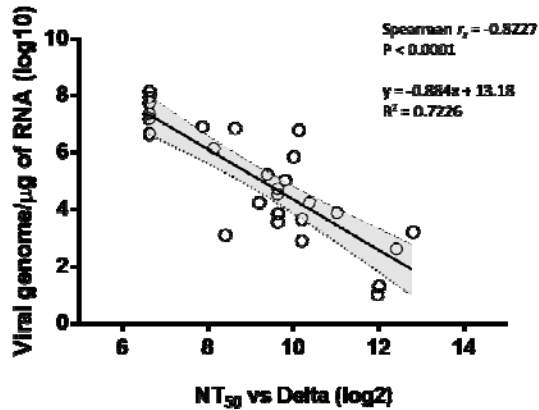

418

419 **Figure 5. Correlation between SARS-CoV-2 viral genome copy numbers and NT<sub>50</sub> titers against the**

420 **Delta variant.** Values of viral genome copy numbers 3 days post infection and NT50 titers against the Delta

421 variant five days after the final immunization were tabulated (n = 29). Spearman's rank correlation coefficient

422 and linear regression were calculated with dotted bands and shaded area representing the 95% confidence

423 bands of the linear regression line.

Groups A, B, and C (n=10/group)

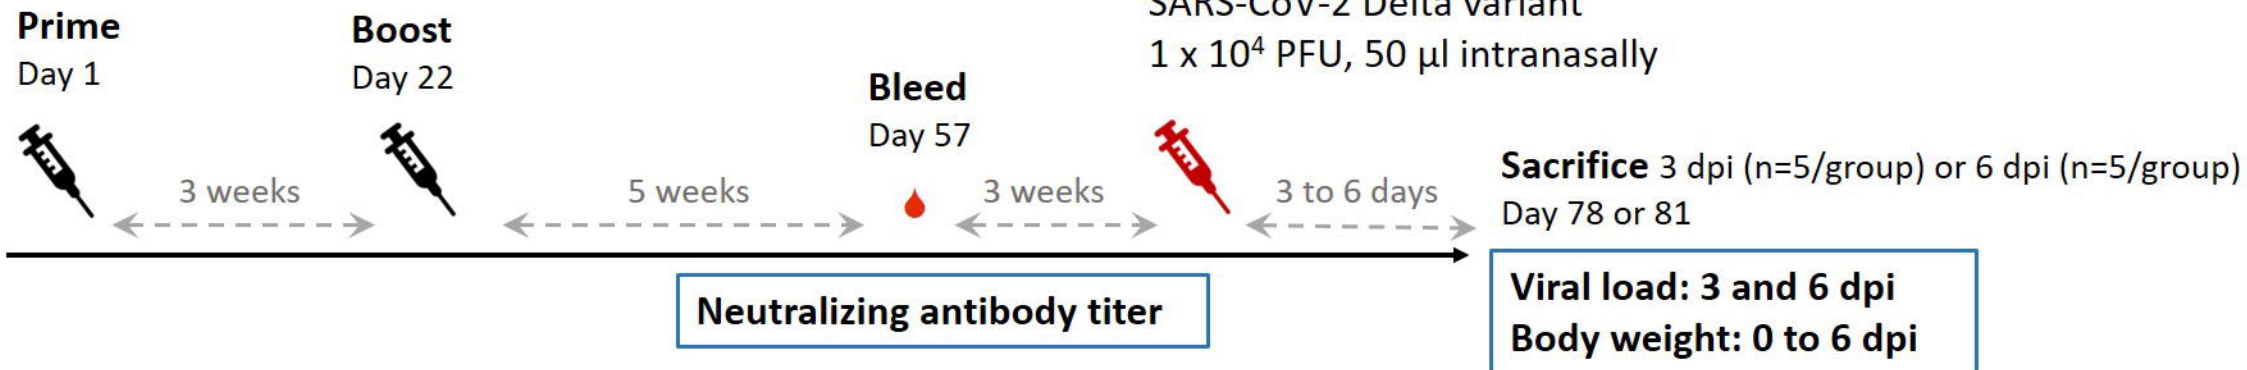

Groups D, E, and F (n=10/group)

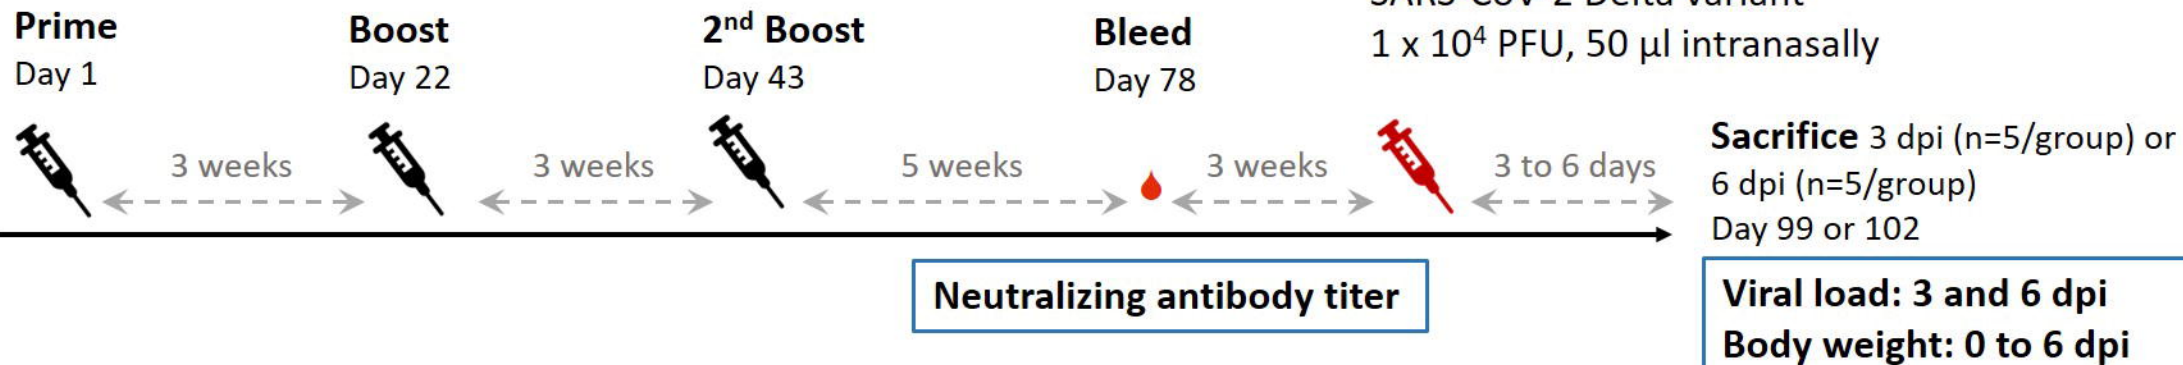

Average NT fold reduction over ancestral strain

|                    |       |      |      |       |      |
|--------------------|-------|------|------|-------|------|
| Delta vs Ancestral | 2.97  | 3.75 | 2.91 | 3.14  | 1.85 |
| Gamma vs Ancestral | 11.39 | 3.10 | 7.16 | 11.41 | 5.09 |
| Beta vs Ancestral  | 13.30 | 1.63 | 5.95 | 15.31 | 6.42 |
| Alpha vs Ancestral | 3.79  | 3.76 | 3.66 | 3.54  | 3.52 |

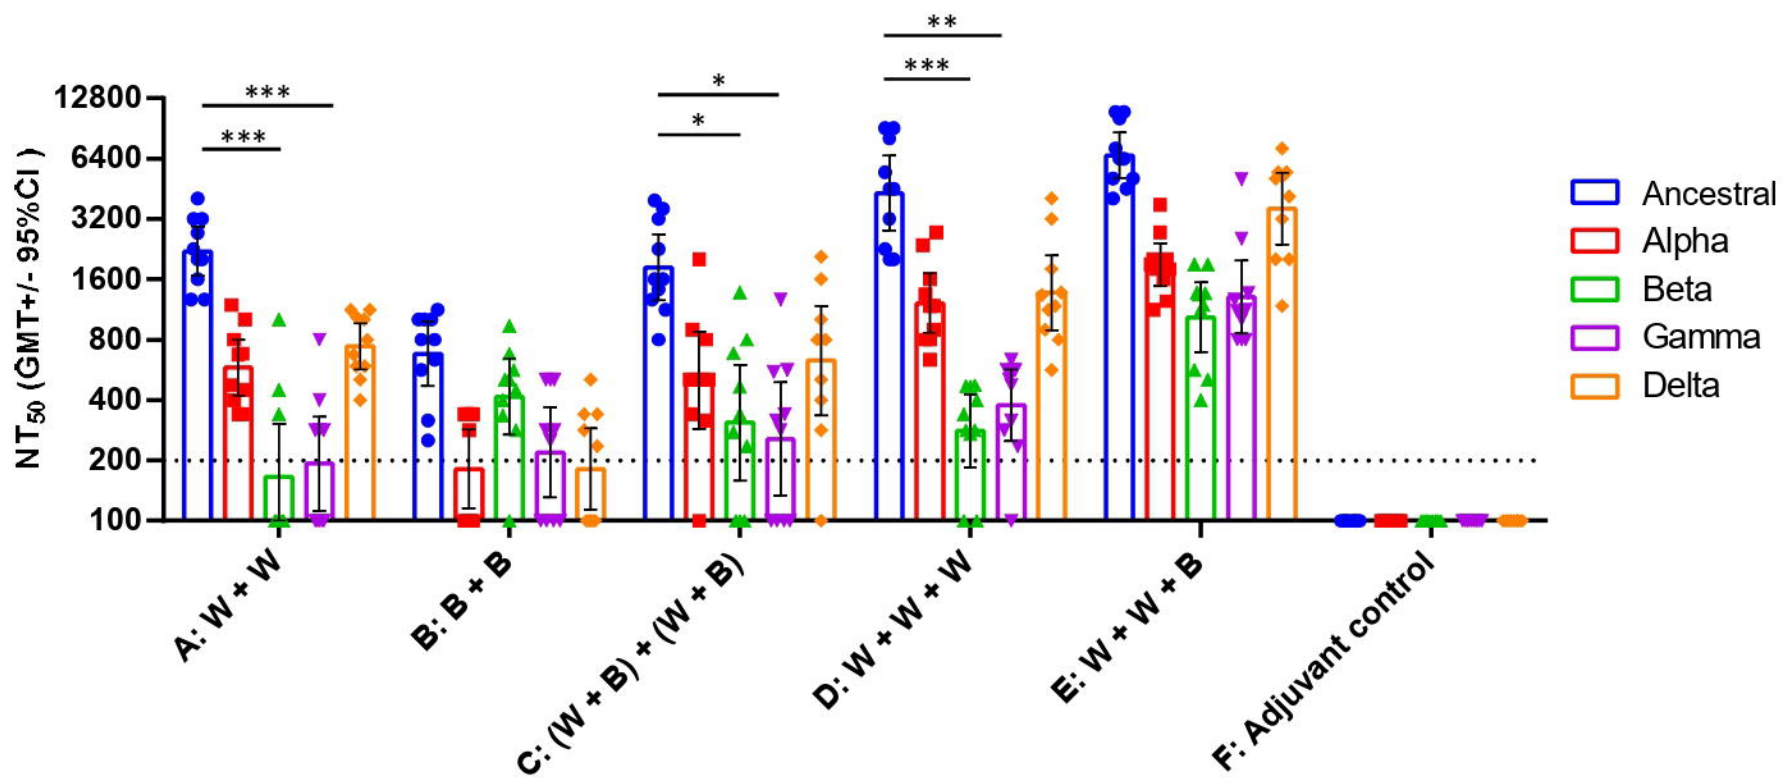

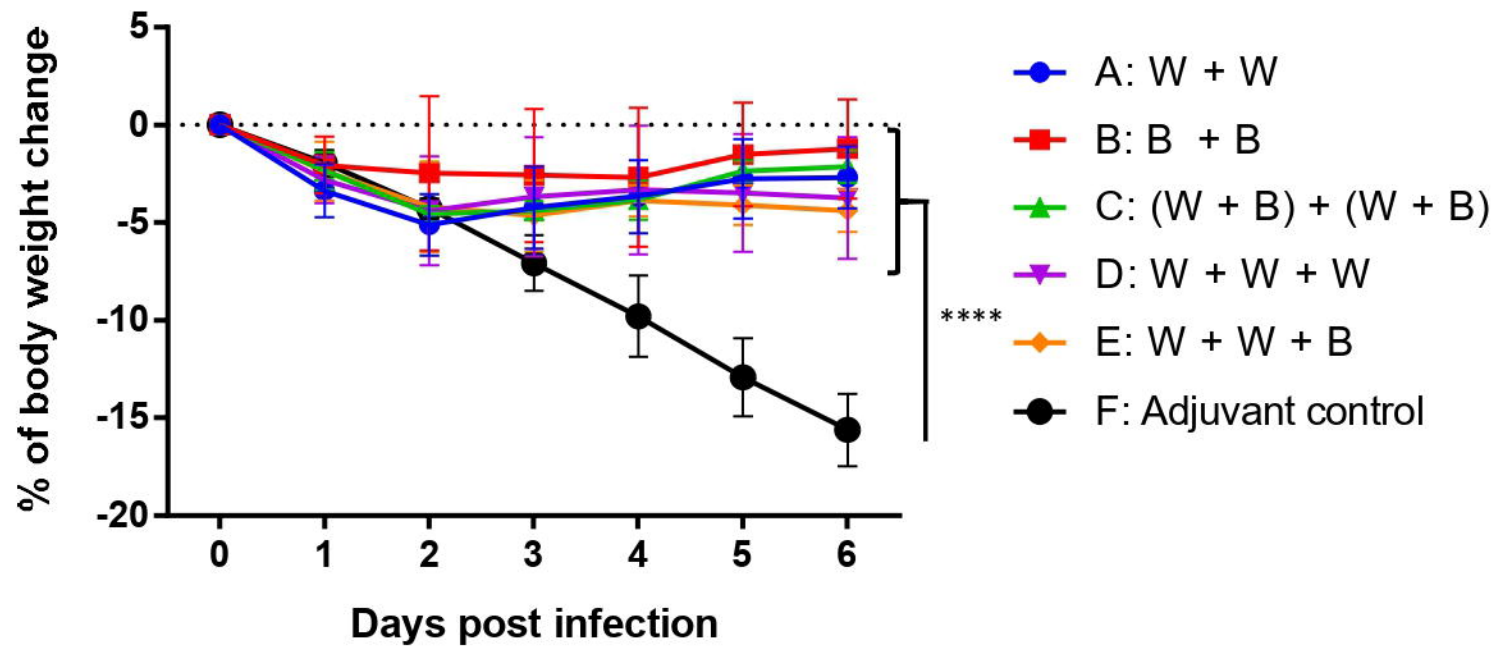

**A**Viral genome/ $\mu\text{g}$  of RNA (log10)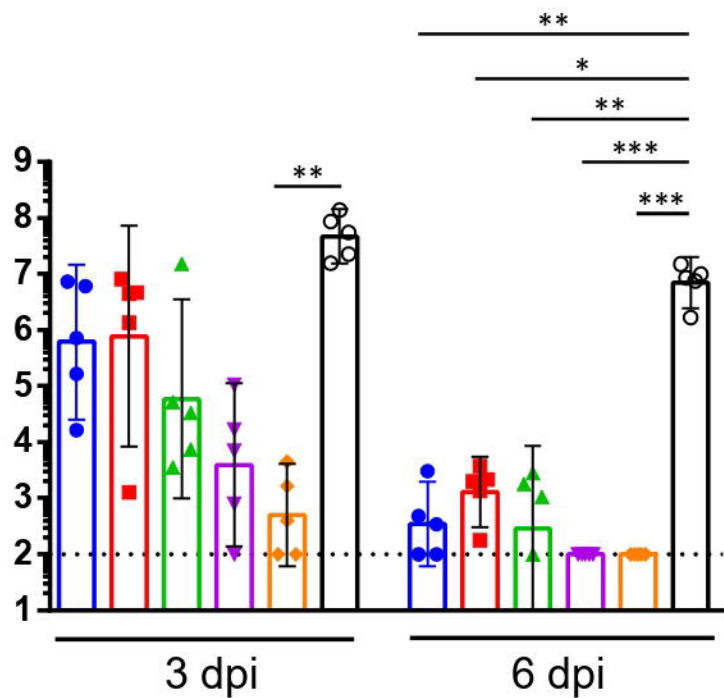**B**TCID<sub>50</sub>/mL (log10)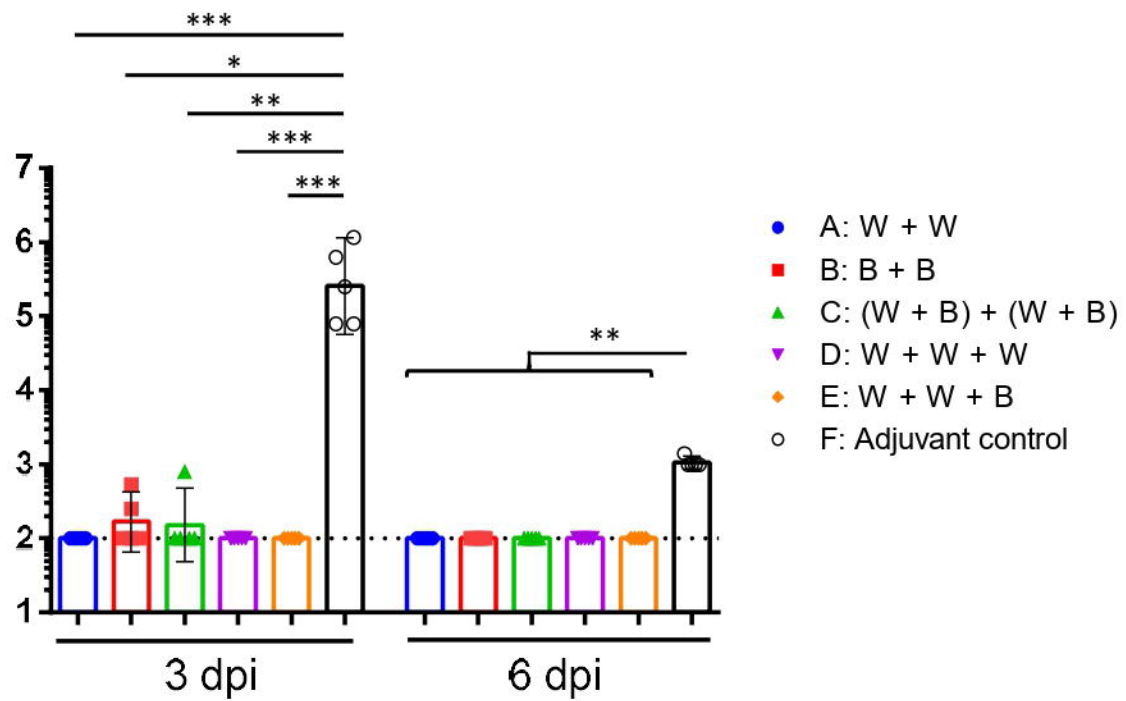

- A: W + W
- B: B + B
- ▲ C: (W + B) + (W + B)
- ▼ D: W + W + W
- ◆ E: W + W + B
- F: Adjuvant control



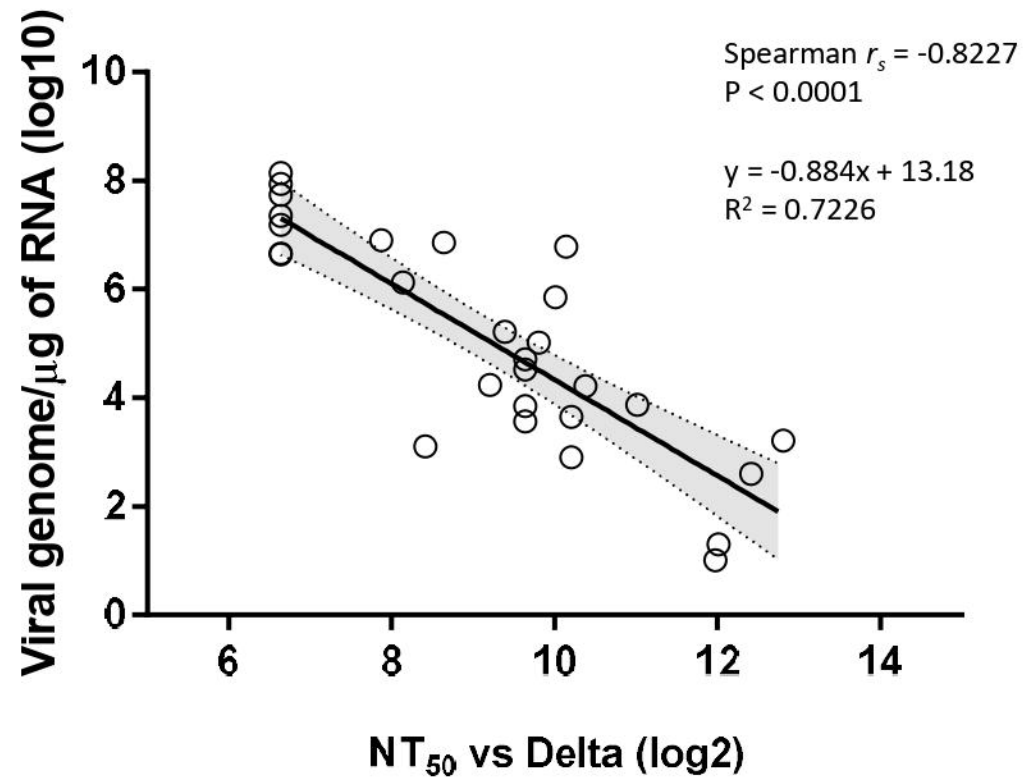

Source: https://biorxiv.org/content/10.1101/2021.09.29.462344v1.full.pdf
